# Supplementary figures and images for: Positive Association between Individualism and Vaccination Resistance against COVID-19 Vaccination among Chinese Adults: Mediations via Perceived Personal and Societal Benefits
Source: MDPI journal article supplement (doi:10.3390/vaccines9111225), 2021-10-21

## Supplementary Materials

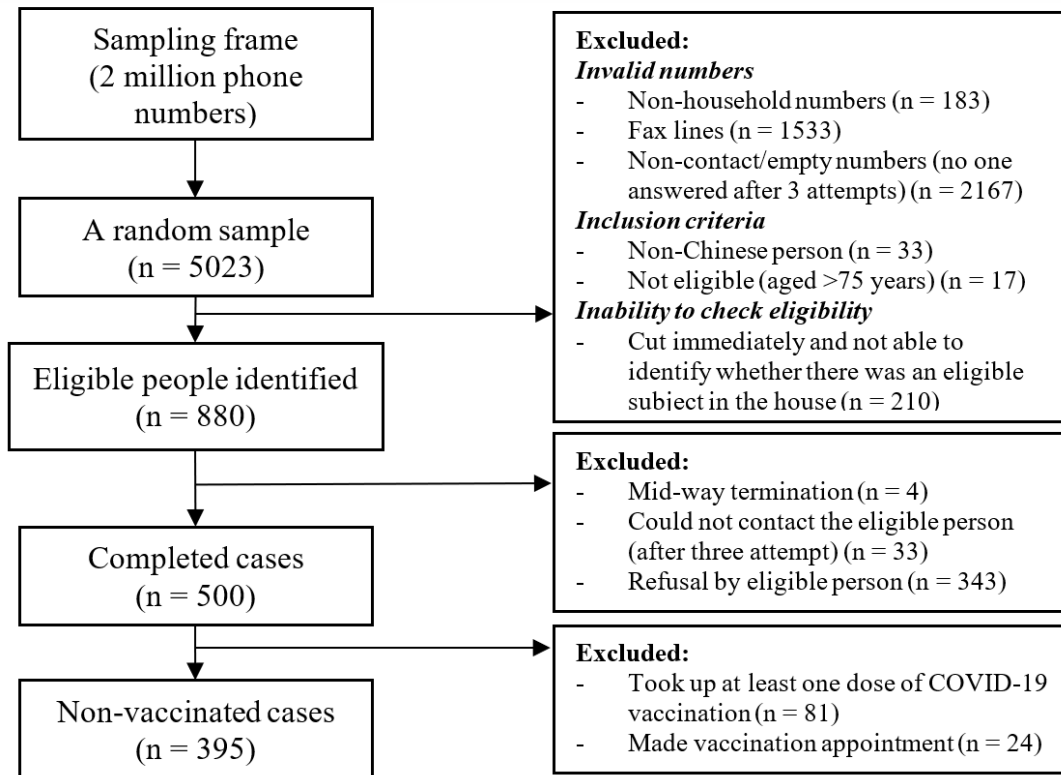

Figure S1. Flowchart of participant recruitment.

Supplement: s1 [file s1]
